# Supplementary material for: Cu-doped LaNiO3 perovskite catalyst for DRM: revisiting it as a molecular-level nanocomposite
Source: Royal Society of Chemistry journal article supplement (doi:10.1039/d4cp02252a), 2024-01-01
Supplement: d4cp02252a1.pdf [file d4cp02252a1.pdf]

## Supplementary Information

### Cu-doped LaNiO<sub>3</sub> perovskite catalyst for DRM: A revisit in the light of molecular level nanocomposite

Akbar Hossain<sup>1</sup>, Kalyan Ghorai<sup>1</sup>, Trilochan Bhunia<sup>1</sup>, Jordi Llorca<sup>2</sup>, M. Vasundhara<sup>3</sup>,  
Parthasarathi Bera<sup>4</sup>, Aathira Bhaskaran<sup>5</sup>, Sounak Roy<sup>5</sup>, Md. Motin Seikh<sup>6</sup> and Arup  
Gayen<sup>1</sup>, \*

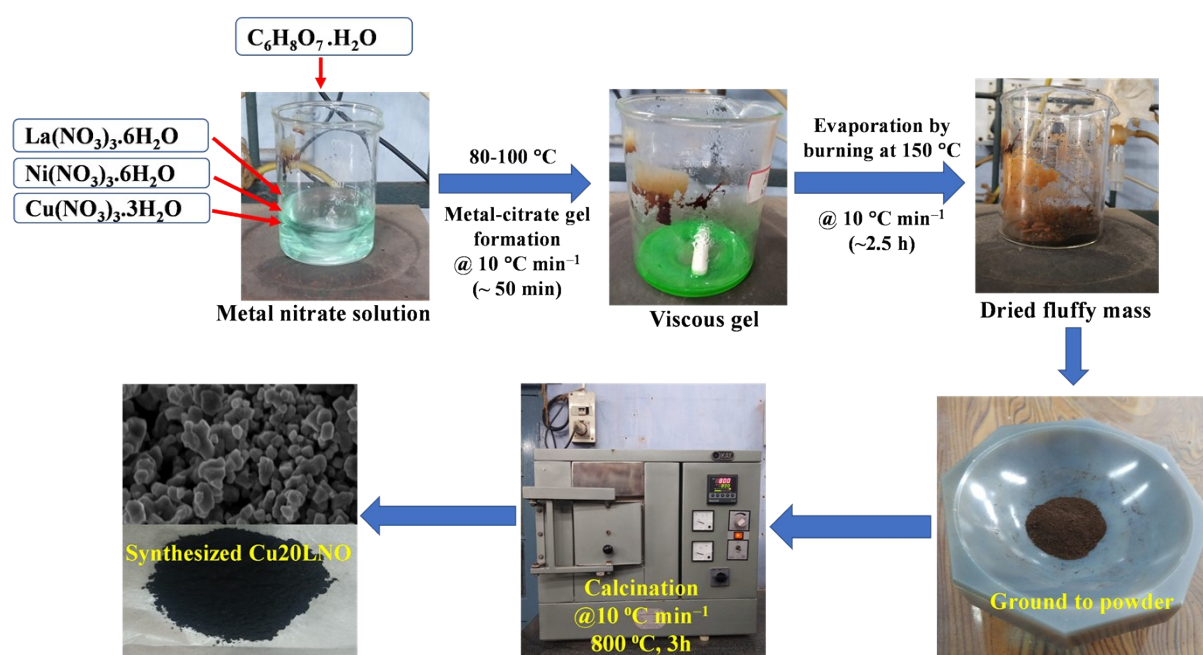

**Scheme S1:** Diagram illustrating the sol-gel process for preparing the Cu<sub>20</sub>LNO catalyst.

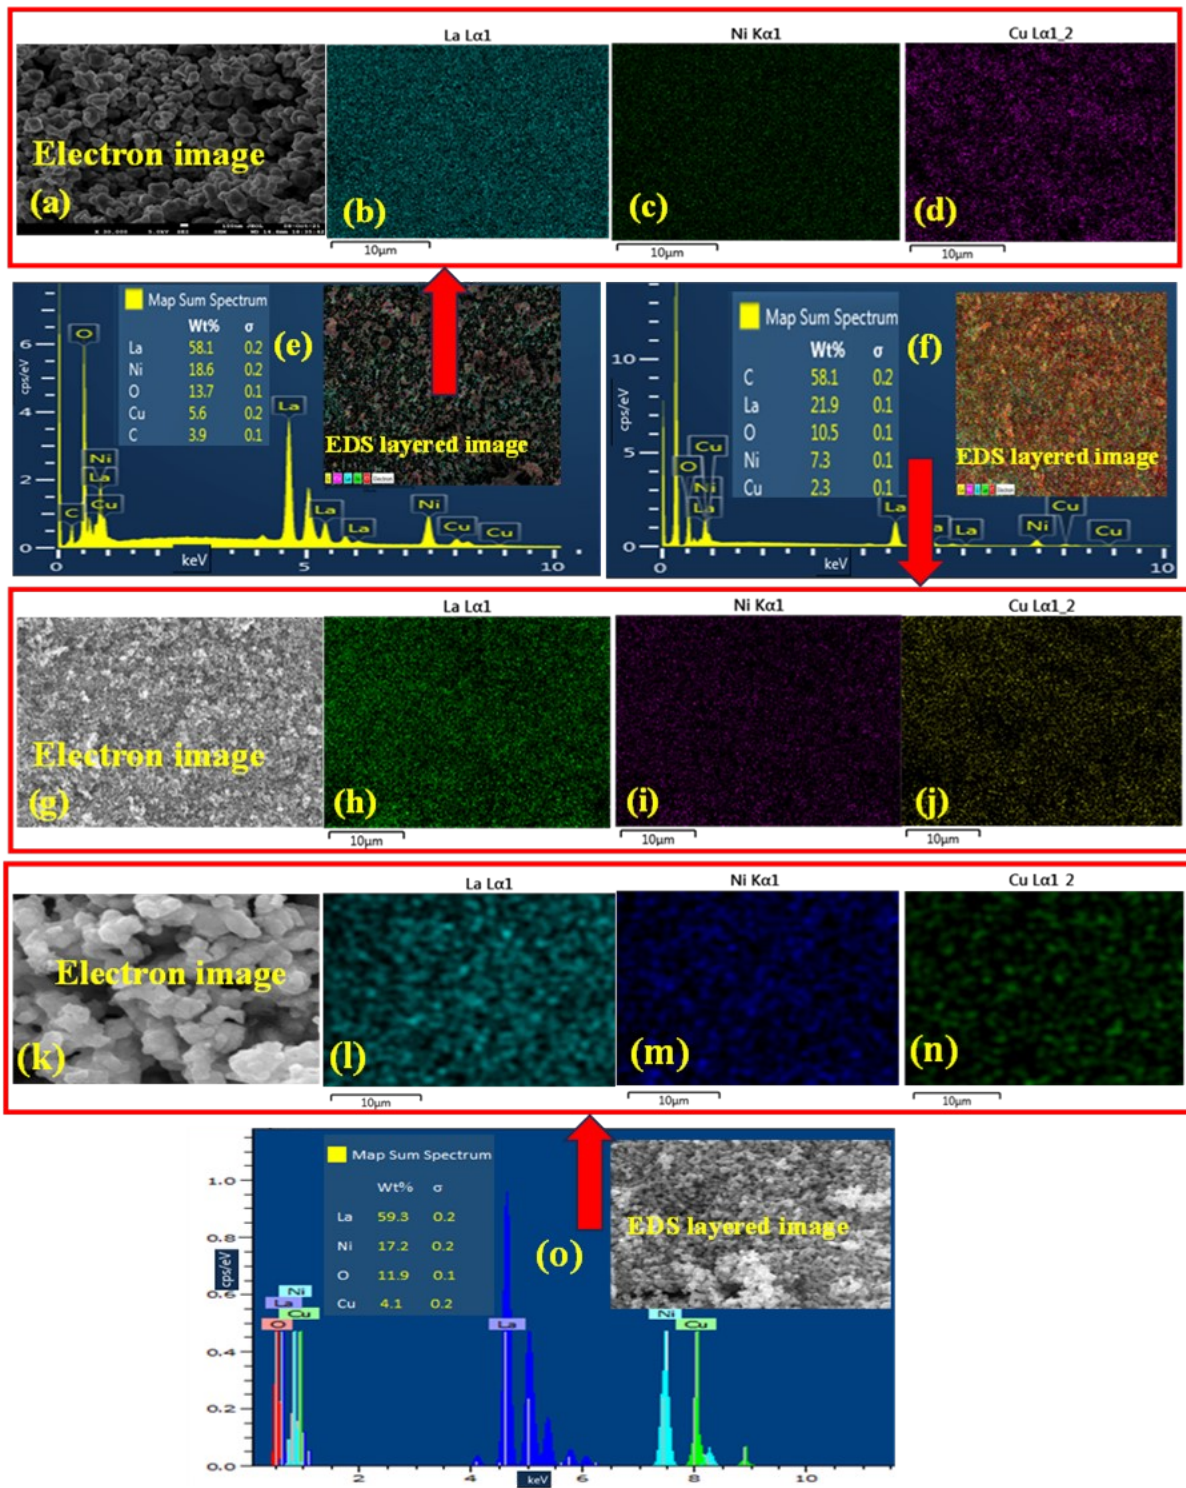

**Fig. S1:** FESEM images (a, g, k); elemental mapping for La (b, h, l), Ni (c, i, m), Cu (d, j, n), and (e, f, o) EDX spectra of fresh aged and regenerated Cu<sub>20</sub>LN<sub>0</sub>, respectively.
